# Supplementary material
Source: Springer Nature journal article supplement (https://www.springermedizin.de/resource/supplementary/12984_2010_245_MOESM6_ESM.pdf/9605608)

Stdev of COP Y,  $\sigma_Y$  vs Entropy Y

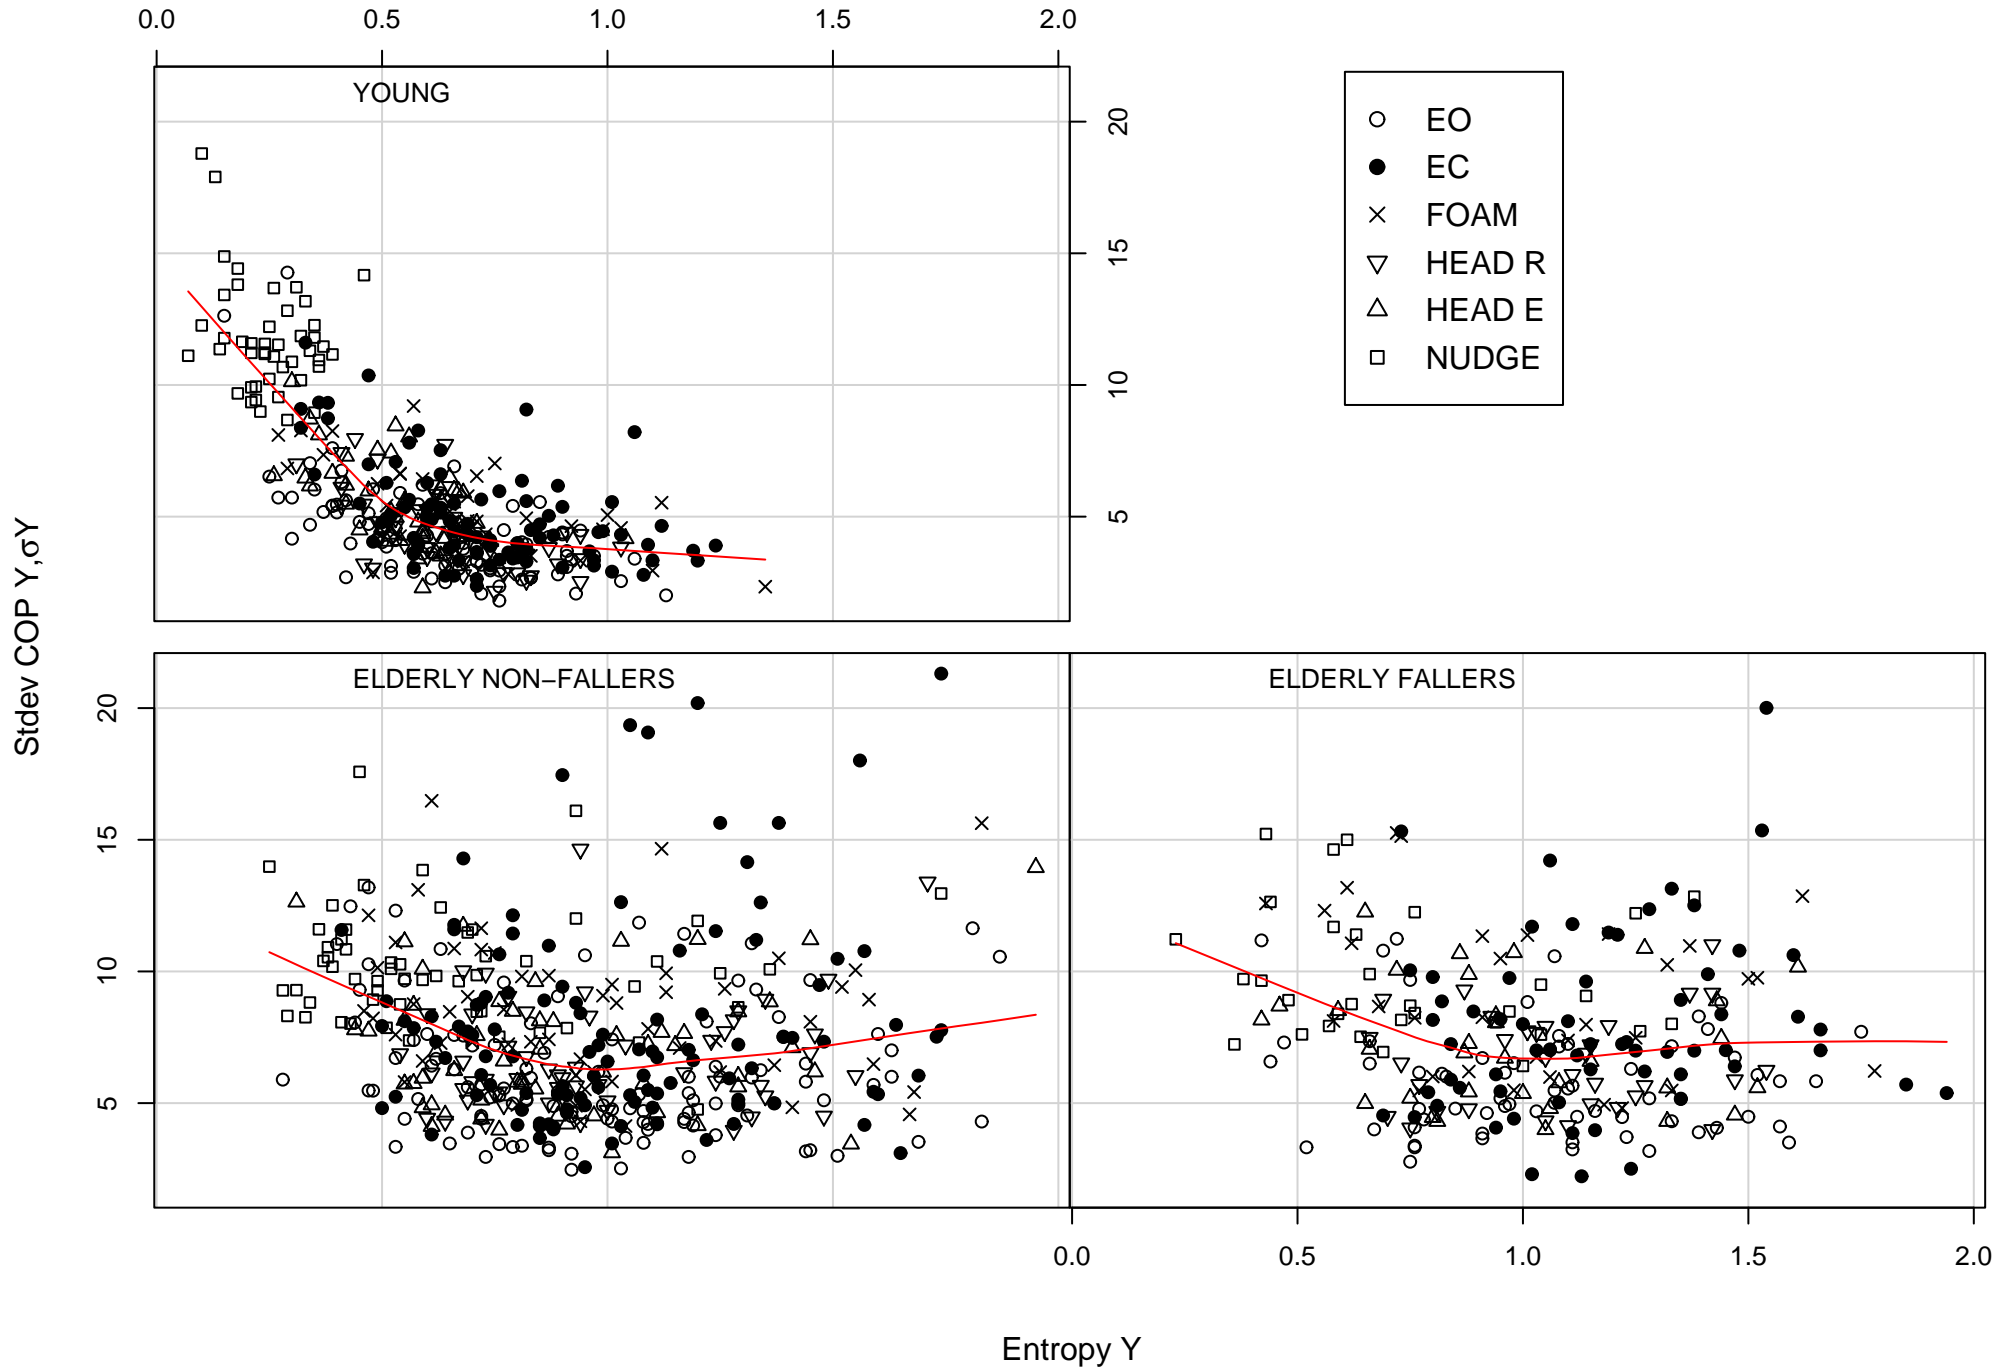

Supplement: MOESM6 [file 9605608]
